# Supplementary material for: mlDEEPre: Multi-Functional Enzyme Function Prediction With Hierarchical Multi-Label Deep Learning
Source: PubMed Central journal article supplement (PMC6349967; doi:10.3389/fgene.2018.00714), 2019-01-22
Supplement: Image_1.pdf [file Image_1.pdf]

# Supplementary Material: mIDEERe: Multi-functional enzyme function prediction with hierarchical multi-label deep learning

## 1 ILLUSTRATION OF KNN BASED METHODS

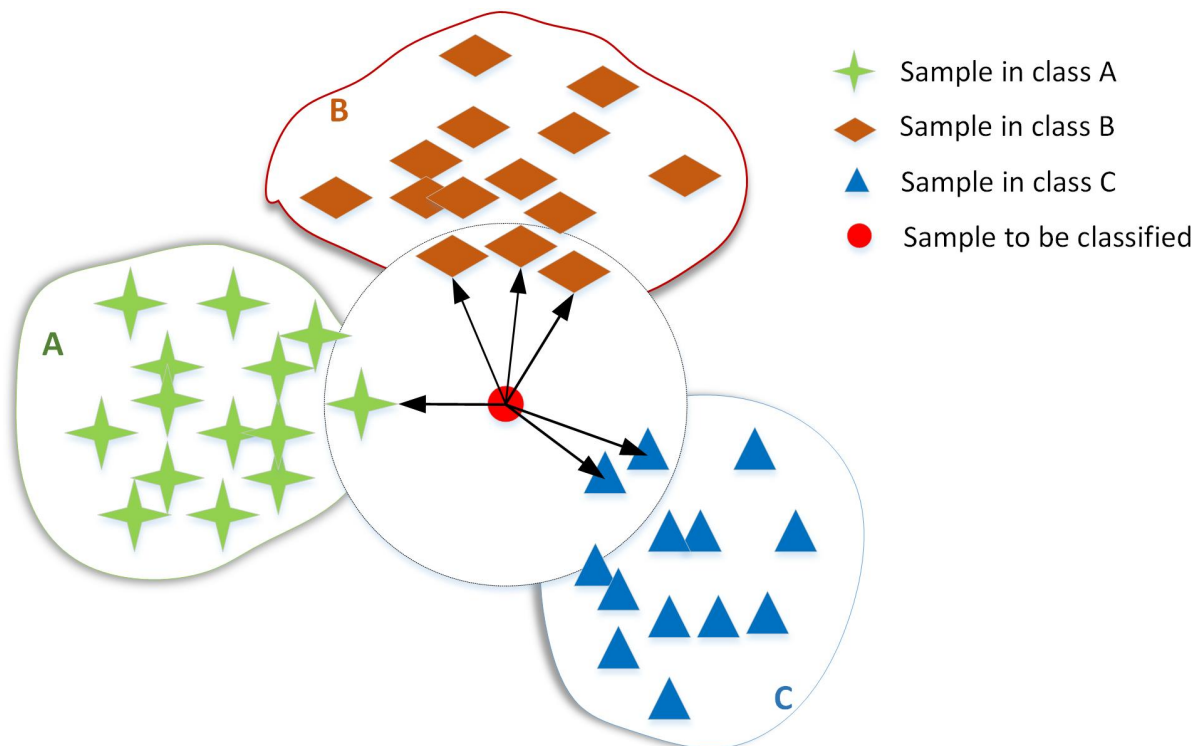

**Figure S1.** Illustration of KNN based methods.
